# Supplementary material for: Small activating RNA binds to the genomic target site in a seed-region-dependent manner
Source: PubMed Central journal article supplement — Nucleic Acids Res. 2016 Feb 11;44(5):2274–82. doi: 10.1093/nar/gkw076 (PMC4797303; doi:10.1093/nar/gkw076), 2016-02-11

# **Small activating RNA binds to the genomic target site in a seed-region-dependent manner**

Xing Meng<sup>1</sup>, Qian Jiang<sup>1</sup>, Nannan Chang<sup>1</sup>, Xiaoxia Wang<sup>1</sup>, Chujun Liu<sup>1</sup>, Jingwei Xiong<sup>1</sup>, Huiqing Cao<sup>1,\*</sup>, and Zicai Liang<sup>1,2,\*</sup>

<sup>1</sup>Institute of Molecular Medicine, Peking University, Beijing, 100871, PR China

<sup>2</sup>Collaborative Innovation Center of Chemical Science and Engineering (Tianjin), Tianjin, 300072, PR China

\* To whom correspondence should be addressed.

Zicai Liang, Tel: +86 10 62769862; Fax: +86 10 62769862; E-mail: liangz@pku.edu.cn

Correspondence may also be addressed to Huiqing Cao, Tel: +86 10 62769861; Fax: +86 10 62769861; E-mail: caohuiqing@pku.edu.cn

Present Address: Institute of Molecular Medicine, Peking University, 5 Yiheyuan Rd, Beijing, 100871, PR China.

**MIQE checklist and additional information regarding the qPCR experiments:** Information of the performed qPCR experiments of PR mRNA and AT-2 expression based on the MIQE (Minimum Information for Publication of Quantitative Real-Time PCR Experiments) guidelines.

| ITEM TO CHECK                                                        | IMPORTANCE | CHECKLIST |
|----------------------------------------------------------------------|------------|-----------|
| <b>EXPERIMENTAL DESIGN</b>                                           |            |           |
| Definition of experimental and control groups                        | E          | ✓         |
| Number within each group                                             | E          | ✓         |
| Assay carried out by core lab or investigator's lab?                 | D          | ✓         |
| Acknowledgement of authors' contributions                            | D          |           |
| <b>SAMPLE</b>                                                        |            |           |
| Description                                                          | E          | ✓         |
| Volume/mass of sample processed                                      | D          | ✓         |
| Microdissection or macrodissection                                   | E          | NA        |
| Processing procedure                                                 | E          | ✓         |
| If frozen - how and how quickly?                                     | E          | ✓         |
| If fixed - with what, how quickly?                                   | E          | NA        |
| Sample storage conditions and duration (especially for FFPE samples) | E          | ✓         |

Experimental and control groups were defined in the figure legends of each figure, as well as the number of experimental repeats. All qPCR experiments were carried out by the investigator's lab. RNA samples were total RNA extracted from MCF-7, HEK293A or mutated cells treated with saRNA or non-specific small RNA (NC). The total volume of each sample ranges from 30 µl to 50 µl, and the total mass ranges 5 µg to 25 µg. After extracted, the RNA samples were frozen in -80°C and reverse transcribed in 2 days.

| <b>NUCLEIC ACID EXTRACTION</b>               |   |   |
|----------------------------------------------|---|---|
| Procedure and/or instrumentation             | E | ✓ |
| Name of kit and details of any modifications | E | ✓ |
| Source of additional reagents used           | D | ✓ |
| Details of DNase or RNase treatment          | E | ✓ |
| Contamination assessment (DNA or RNA)        | E | ✓ |
| Nucleic acid quantification                  | E | ✓ |
| Instrument and method                        | E | ✓ |
| Purity (A260/A280)                           | D | ✓ |
| Yield                                        | D | ✓ |
| RNA integrity method/instrument              | E | ✓ |
| RIN/RQI or Cq of 3' and 5' transcripts       | E | ✓ |

|                                                          |    |   |
|----------------------------------------------------------|----|---|
| Electrophoresis traces                                   | D  | ✓ |
| Inhibition testing (Cq dilutions, spike or other)        | E  | ✓ |
| <b>REVERSE TRANSCRIPTION</b>                             |    |   |
| Complete reaction conditions                             | E  | ✓ |
| Amount of RNA and reaction volume                        | E  | ✓ |
| Priming oligonucleotide (if using GSP) and concentration | E  | ✓ |
| Reverse transcriptase and concentration                  | E  | ✓ |
| Temperature and time                                     | E  | ✓ |
| Manufacturer of reagents and catalogue numbers           | D  | ✓ |
| Cqs with and without RT                                  | D* | ✓ |
| Storage conditions of cDNA                               | D  | ✓ |

Total RNA was isolated using 0.5 ml per sample ( $1 \times 10^5$ - $1 \times 10^6$  cells) TRI Reagent (Sigma-Aldrich) following the manufacturer's protocol. The primer pairs used in qPCR were designed to target different exons of mature mRNA, which ensured that genomic DNA could not be detected. We checked the PCR product by gel, melting curve analysis and sequencing to make sure there was only one expected amplicon. These ensured that DNA template won't be detected even if there was residual DNA in total RNA. Therefore, it is unnecessary in our system to digest total RNA with DNase. RNA concentrations and qualities were determined using a NanoDrop spectrophotometer (ND-1000, Nanodrop). RNA samples with 260/280 ratio from 1.9 to 2.1 and 260/230 ratio from 1.8 to 2.2 were considered qualified in our experiment. The integrity of RNA was determined by the electrophoresis of 0.5 µg RNA on 1% agarose gel. Different dilutions of cDNA were demonstrate by different primers and observed decreases in Cqs that consistent with the anticipated result.

Reverse transcription was performed using oligo dT primer (Transgene) and TransScript reverse transcriptase (Transgene) following the manufacturer's protocol. A 20 µl reverse transcription reaction contained 1 µg of total RNA, 4 µl 5xRT-Buffer, 1 µl oligo dT primer (0.5 µg/ul), 1 µl dNTP Mix (25 mM, Promega), 0.5 µl RNasin (40 U/µl, Tiangen), 1 µl TransScript reverse transcriptase (200 U/µl) and RNase-free water. The conditions of reverse transcription were 42°C for 30 min, followed by 85°C for 5 min. cDNA was stored in -80°C. In samples without RT, no amplification was detected.

|                                                 |   |    |
|-------------------------------------------------|---|----|
| <b>qPCR TARGET INFORMATION</b>                  |   |    |
| If multiplex, efficiency and LOD of each assay. | E | NA |
| Sequence accession number                       | E | ✓  |
| Location of amplicon                            | D | ✓  |
| Amplicon length                                 | E | ✓  |

|                                                           |            |    |
|-----------------------------------------------------------|------------|----|
| <i>In silico</i> specificity screen (BLAST, etc)          | <b>E</b>   | ✓  |
| Pseudogenes, retropseudogenes or other homologs?          | <b>D</b>   | ✓  |
| Sequence alignment                                        | <b>D</b>   | ✓  |
| Secondary structure analysis of amplicon                  | <b>D</b>   |    |
| Location of each primer by exon or intron (if applicable) | <b>E</b>   | ✓  |
| What splice variants are targeted?                        | <b>E</b>   | NA |
| <b>qPCR OLIGONUCLEOTIDES</b>                              |            |    |
| Primer sequences                                          | <b>E</b>   | ✓  |
| RT Primer DB Identification Number                        | <b>D</b>   | NA |
| Probe sequences                                           | <b>D**</b> | NA |
| Location and identity of any modifications                | <b>E</b>   | NA |
| Manufacturer of oligonucleotides                          | <b>D</b>   | ✓  |
| Purification method                                       | <b>D</b>   | ✓  |

Detail information of targets and amplicons for each target gene was list in the table below:

| Gene name           | Amplicon length | NCBI accession No.              | Primer sets | Primers locations according to Gene |
|---------------------|-----------------|---------------------------------|-------------|-------------------------------------|
| PR<br>(PR-B & PR-A) | 196 bp          | NM_000926.4 &<br>NM_001202474.3 | PR-3/4-RT-F | exon 3                              |
|                     |                 |                                 | PR-3/4-RT-R | exon 4                              |
| AT-2                | 150 bp          | NR_073144.1                     | AT2-2/3-F   | exon 1/2 junction                   |
|                     |                 |                                 | AT2-2/3-R   | exon 3                              |
| GAPDH               | 115 bp          | NM_002046.5                     | GAPDH-F     | exon 1                              |
|                     |                 |                                 | GAPDH-R     | exon 2/3 junction                   |

The primer sets of each target were analyzed with NCBI Blast to ensure specificity. The sequences of primers were listed in Table S1. DNA oligonucleotides were from Biosune (Beijing) and purified with PAGE method.

| <b>qPCR PROTOCOL</b>                                      |          |   |
|-----------------------------------------------------------|----------|---|
| Complete reaction conditions                              | <b>E</b> | ✓ |
| Reaction volume and amount of cDNA/DNA                    | <b>E</b> | ✓ |
| Primer, (probe), Mg <sup>++</sup> and dNTP concentrations | <b>E</b> | ✓ |
| Polymerase identity and concentration                     | <b>E</b> | ✓ |
| Buffer/kit identity and manufacturer                      | <b>E</b> | ✓ |
| Exact chemical constitution of the buffer                 | <b>D</b> |   |
| Additives (SYBR Green I, DMSO, etc.)                      | <b>E</b> | ✓ |
| Manufacturer of plates/tubes and catalog number           | <b>D</b> | ✓ |

|                                                          |          |    |
|----------------------------------------------------------|----------|----|
| Complete thermocycling parameters                        | <b>E</b> | ✓  |
| Reaction setup (manual/robotic)                          | <b>D</b> | ✓  |
| Manufacturer of qPCR instrument                          | <b>E</b> | ✓  |
| <b>qPCR VALIDATION</b>                                   |          |    |
| Evidence of optimisation (from gradients)                | <b>D</b> |    |
| Specificity (gel, sequence, melt, or digest)             | <b>E</b> | ✓  |
| For SYBR Green I, Cq of the NTC                          | <b>E</b> | ✓  |
| Standard curves with slope and y-intercept               | <b>E</b> | ✓  |
| PCR efficiency calculated from slope                     | <b>E</b> | ✓  |
| Confidence interval for PCR efficiency or standard error | <b>D</b> | ✓  |
| r <sup>2</sup> of standard curve                         | <b>E</b> | ✓  |
| Linear dynamic range                                     | <b>E</b> | ✓  |
| Cq variation at lower limit                              | <b>E</b> | ✓  |
| Confidence intervals throughout range                    | <b>D</b> |    |
| Evidence for limit of detection                          | <b>E</b> | ✓  |
| If multiplex, efficiency and LOD of each assay.          | <b>E</b> | NA |

qPCR analyses were performed in optical 96-well plates (Axygen) with StepOnePlus™ Instrument (ABI). The cycling conditions were 95°C for 2 min, followed by 40 cycles of 95°C for 15 s, and 65°C for 15 s, 68°C for 20 s, and followed by a melting curve analysis (95 °C for 15 s, 55 °C for 15s, 1 °C increases for 30 s up to 95 °C). A 20 µl reaction contained 1 µl of 5xSYBR Green (ThermoFisher), 0.25 µl of each primer (20 µM), 1 µl of dNTP mix (2.5 mM, Promega), 0.25 µl of HotMaster Taq (5 U/µl, Tiangen) and 2 µl of cDNA template (diluted from 20 µl to 50 µl). Reactions were set up manually in a sterile bench using designated equipment.

The primer sets was checked for the specificity by gel, melting curve analysis and sequencing. Primers used in qPCR were demonstrated to have good linear correlation and equal priming efficiency for the different dilutions compared to the Ct values. We considered a PCR efficiency range from 90%-110% as acceptable in our study. The informations in detail were listed in the table below.

| Gene  | Efficiency | Slope | R <sup>2</sup> | Cq of lower limit | NTC |
|-------|------------|-------|----------------|-------------------|-----|
| PR    | 105.35%    | -3.16 | 0.9996         | 28.27             | NA  |
| AT-2  | 96.60%     | -3.43 | 0.9964         | 31.82             | NA  |
| GAPDH | 96.49%     | -3.40 | 0.9942         | 17.82             | NA  |

|                                         |          |   |
|-----------------------------------------|----------|---|
| <b>DATA ANALYSIS</b>                    |          |   |
| qPCR analysis program (source, version) | <b>E</b> | ✓ |
| Cq method determination                 | <b>E</b> | ✓ |
| Outlier identification and disposition  | <b>E</b> | ✓ |

|                                                       |          |   |
|-------------------------------------------------------|----------|---|
| Results of NTCs                                       | <b>E</b> | ✓ |
| Justification of number and choice of reference genes | <b>E</b> | ✓ |
| Description of normalisation method                   | <b>E</b> | ✓ |
| Number and concordance of biological replicates       | <b>D</b> | ✓ |
| Number and stage (RT or qPCR) of technical replicates | <b>E</b> | ✓ |
| Repeatability (intra-assay variation)                 | <b>E</b> | ✓ |
| Reproducibility (inter-assay variation, %CV)          | <b>D</b> |   |
| Power analysis                                        | <b>D</b> |   |
| Statistical methods for result significance           | <b>E</b> | ✓ |
| Software (source, version)                            | <b>E</b> | ✓ |
| Cq or raw data submission using RDML                  | <b>D</b> |   |

Raw data of qPCR was analyzed using StepOne™ Software v2.2.2 (ABI) and the determination of Cqs and outlier was performed automatically. The relative expression of each target gene was determined using the formula  $2^{-\Delta\Delta C_t}$ . For NTC, we did not observed any specific amplicon. GAPDH was chose as reference gene and used as the internal control. Numbers of biological replicates were stated in figure legends, and three technical replicates of qPCR were performed for each sample. qPCR assay in our study has good repeatability (SD=0.19). All data are shown as mean ± SEM. Statistical analysis was performed with Student's t-test to evaluate single-factor differences between two sets of data, or with ANOVA followed by the Bonferroni post-hoc test for multiple comparisons.

## Supplementary Data

**Table S1**

Primers used in these studies.

| Primer            | Sequence                  |
|-------------------|---------------------------|
| PR-3/4-RT-F       | TGGAAGAAATGACTGCATCG      |
| PR-3/4-RT-R       | TAGGGCTTGGCTTTCATTTG      |
| GAPDH-RT-F        | GCTCTCTGCTCCTCCTGTTC      |
| GAPDH-RT-R        | ACGACCAAATCCGTTGACTC      |
| 1611T7E1-F1       | GGCATTAGCCATCAGGAAAA      |
| 1611T7E1-R1       | AATCTCCCAGCAGCCACTAA      |
| 1611T7E1-F2       | GGCAATGCTGTCCTGATTTT      |
| 1611ST7E1-R2      | AAATCTCCCAGCAGCCACTA      |
| 1611pulldown-6-F  | CATGTGGAACATGGATGAACCT    |
| 1611pulldown-6-R  | AATCTCAATACCCACTAGCAGTT   |
| 1611pulldown-36-F | AATAGCCAAATCACAGGTACAAAA  |
| 1611pulldown-36-R | TGACTCTAAAATCTCAATACCCACT |
| ATEx2/3-F         | CGGACCTCAAGGTCTAGCTG      |
| ATEx2/3-R         | CCAAGAGGAGCACAAGACATC     |

Sequences are listed 5' to 3'.

**Table S2**

Wild type saRNAs used in these studies.

| RNA     | site        | strand sequence      |
|---------|-------------|----------------------|
| PR+1    | +1/ +19     | AGUCCACAGCUGUCACUAA  |
| PR+2    | +2/ +20     | GUCCACAGCUGUCACUAAU  |
| PR+4    | +4/ +22     | CCACAGCUGUCACUAAUCG  |
| PR+23   | +23/ +41    | GGGUAAGCCUUGUUGUAAU  |
| PR+56   | +56/ +74    | GCAUUCUCAAUAGAGAACUA |
| PR-1    | -1/ +18     | CAGUCCACAGCUGUCACUA  |
| PR-38   | -38/ -19    | CCCUAGAGGAGGAGGCGUU  |
| PR-120  | -120/-101   | CAGAAUAACGGGUGGAAAU  |
| PR-214  | -214/-195   | CCAAUUAGAUAGGGCAUAA  |
| PR-520  | -520/-501   | GCACACAACAUCCAAACUU  |
| PR-532  | -532/-513   | AAUCGAAGUGUGGCACACA  |
| PR-549  | -549/-530   | ACACAUUCCUUAAGACAAA  |
| PR-808  | -808/-789   | CCCAAUGGUCUUGGGUCA   |
| PR-891  | -891/-872   | GCUAGACCUUGAGGUCCUA  |
| PR-1042 | -1042/-1023 | CCUAACAUGAUAAAGGUUU  |
| PR-1056 | -1056/-1037 | CCAAUCCUAGUAACCUAA   |
| PR-1060 | -1060/-1041 | AACUCCAAAUCUAGUAAC   |
| PR-1382 | -1382/-1363 | UUGAGUGAGCUGUAUGUA   |
| PR-1484 | -1484/-1465 | GCUAGUGGGUAUUGAGAUU  |
| PR-1596 | -1596/-1577 | AGUACUGAUUCAUGUGGAA  |
| PR-1597 | -1597/-1578 | AAGUACUGAUUCAUGUGGA  |
| PR-1598 | -1598/-1579 | GAAGUACUGAUUCAUGUGG  |
| PR-1599 | -1599/-1580 | UGAAGUACUGAUUCAUGUG  |
| PR-1600 | -1600/-1581 | GUGAAGUACUGAUUCAUGU  |
| PR-1601 | -1601/-1582 | AGUGAAGUACUGAUUCAUG  |
| PR-1602 | -1602/-1583 | GAGUGAAGUACUGAUUCAU  |
| PR-1603 | -1603/-1584 | GGAGUGAAGUACUGAUUCA  |
| PR-1604 | -1604/-1585 | AGGAGUGAAGUACUGAUUC  |
| PR-1605 | -1605/-1586 | AAGGAGUGAAGUACUGAUU  |
| PR-1606 | -1606/-1587 | GAAGGAGUGAAGUACUGAU  |
| PR-1607 | -1607/-1588 | UGAAGGAGUGAAGUACUGA  |
| PR-1608 | -1608/-1589 | GUGAAGGAGUGAAGUACUG  |
| PR-1609 | -1609/-1590 | AGUGAAGGAGUGAAGUACU  |
| PR-1610 | -1610/-1591 | GAGUGAAGGAGUGAAGUAC  |
| PR-1611 | -1611/-1592 | GGAGUGAAGGAGUGAAGUA  |
| PR-1612 | -1612/-1593 | AGGAGUGAAGGAGUGAAGU  |
| PR-1613 | -1613/-1594 | AAGGAGUGAAGGAGUGAAG  |
| PR-1614 | -1614/-1595 | AAAGGAGUGAAGGAGUGAA  |
| PR-1615 | -1615/-1596 | AAAAGGAGUGAAGGAGUGA  |
| PR-1616 | -1616/-1597 | AAAAAGGAGUGAAGGAGUG  |
| PR-1617 | -1617/-1598 | UAAAAGGAGUGAAGGAGU   |



|         |             |                     |
|---------|-------------|---------------------|
| PR-1618 | -1618/-1599 | AUAAAAAGGAGUGAAGGAG |
| PR-1619 | -1619/-1600 | AAUAAAAAGGAGUGAAGGA |
| PR-1620 | -1620/-1601 | CAAUAAAAAGGAGUGAAGG |
| PR-1621 | -1621/-1602 | UCAUAAAAAGGAGUGAAG  |
| PR-1622 | -1622/-1603 | GUCAAUAAAAAGGAGUGAA |
| PR-1623 | -1623/-1604 | UGUCAAUAAAAAGGAGUGA |
| PR-1624 | -1624/-1605 | UUGUCAAUAAAAAGGAGUG |
| PR-1625 | -1625/-1606 | UUUGUCAAUAAAAAGGAGU |
| PR-1626 | -1626/-1607 | AUUUGUCAAUAAAAAGGAG |

---

Only the sense strands are shown (The sense strand is in the same orientation of the coding strand of target gene). Sequences are listed 5' to 3'. The other strands of the RNA duplex are complementary and not include two thymidine bases at the 3' termini as indicated.

---

**Table S3**

Mutated saRNAs used in these studies.

| RNA                | Sense strand         | Antisense strand    |
|--------------------|----------------------|---------------------|
| PR-11M2            | GCUGUCUGGCCAGUCCAGA  | UCUGGACUGGCCAGACAGC |
| PR-11M4            | GCUGUCUGGCCAGUCGACA  | UGUCGACUGGCCAGACAGC |
| PR-11M6            | GCUGUCUGGCCAGGCCACA  | UGUGGCCUGGCCAGACAGC |
| PR-11M8            | GCUGUCUGGCCCGUCCACA  | UGUGGACGGGCCAGACAGC |
| PR-11M10           | GCUGUCUGGGCAGUCCACA  | UGUGGACUGCCAGACAGC  |
| PR-11M12           | GCUGUCUUGCCAGUCCACA  | UGUGGACUGGCAAGACAGC |
| PR-11M14           | GCUGUGUGGCCAGUCCACA  | UGUGGACUGGCCACACAGC |
| PR-11M16           | GCUUUCUGGCCAGUCCACA  | UGUGGACUGGCCAGAAAGC |
| PR-11M17           | GC GGUCUGGCCAGUCCACA | UGUGGACUGGCCAGACCGC |
| PR-11M18           | GGUGUCUGGCCAGUCCACA  | UGUGGACUGGCCAGACACC |
| PR-1611M2          | GGAGUGAAGGAGUGAAGGA  | UCCUUCACUCCUUCACUCC |
| PR-1611M4          | GGAGUGAAGGAGUGACGUA  | UACGUCACUCCUUCACUCC |
| PR-1611M6          | GGAGUGAAGGAGUUAAGUA  | UACUUAACUCCUUCACUCC |
| PR-1611M8          | GGAGUGAAGGAUUGAAGUA  | UACUUCAAUCCUUCACUCC |
| PR-1611M10         | GGAGUGAAGUAGUGAAGUA  | UACUUCACUACUUCACUCC |
| PR-1611M12         | GGAGUGACGGAGUGAAGUA  | UACUUCACUCCGUCACUCC |
| PR-1611M14         | GGAGUUAAGGAGUGAAGUA  | UACUUCACUCCUUAACUCC |
| PR-1611M16         | GGAUUGAAGGAGUGAAGUA  | UACUUCACUCCUUCAUCC  |
| PR-1611M17         | GGCGUGAAGGAGUGAAGUA  | UACUUCACUCCUUCACGCC |
| PR-1611M18         | GUAGUGAAGGAGUGAAGUA  | UACUUCACUCCUUCACUAC |
| PR-1611senseM4     | GGAGUGAAGGAGUGACGUA  | UGUGGACUGGCCAGACAGC |
| PR-1611senseM6     | GGAGUGAAGGAGUUAAGUA  | UGUGGACUGGCCAGACAGC |
| PR-1611senseM8     | GGAGUGAAGGAUUGAAGUA  | UGUGGACUGGCCAGACAGC |
| PR-1611antisenseM4 | GGAGUGAAGGAGUGAAGUA  | UACGUCACUCCUUCACUCC |
| PR-1611antisenseM6 | GGAGUGAAGGAGUGAAGUA  | UACUUAACUCCUUCACUCC |
| PR-1611antisenseM8 | GGAGUGAAGGAGUGAAGUA  | UACUUCAAUCCUUCACUCC |

Sequences are listed 5' to 3'. Two thymidine bases at the 3' termini are not shown as indicated. Mutate bases are shown in red.

**Table S4**

Targets of gRNAs used in these studies.

---

|       | gRNA target sequence    |
|-------|-------------------------|
| PR-G1 | AATATTATTTGTCAATAAAA    |
| PR-G2 | TTGTCAATAAAAAGGAGTGA    |
| PR-G3 | AAGGAGTGAAGTACTGATTCATG |
| PR-G4 | GAAGTACTGATTCATGTGGAACA |

---

Sequences are listed 5' to 3'.

---

**Table S5**

siRNA used in these studies.

---

| RNA     | target mRNA | strand sequence     |
|---------|-------------|---------------------|
| PR-si1  | PR          | GCACAAUUACCCAAGAUAU |
| AT2-si1 | AT-2        | CCAGGACACCACAUUUAAU |
| AT2-si2 | AT-2        | CCUGCCUUGACGUUCGAAA |

---

Only the sense strand is shown (The sense strand is in the same orientation of the coding strand of target gene). Sequences are listed 5' to 3'. The other strand of the RNA duplex is complementary and not includes two thymidine bases at the 3' termini as indicated.

---

## FIGURES LEGENDS

### Figure S1. The activity of mutated PR-1611 in reporter assay.

(A) Schematic representation of the construction of luciferase reporter gene. A new start codon (red) and restriction enzyme cutting sites (blue) were inserted adjacent to the luciferase gene (yellow). Targets of indicate small RNAs (light blue) are inserted between the restriction enzyme cutting sites to form a modified luciferase gene. (B) Schematic representation of the working model of the Dual luciferase assay. Targets of sense (green) or antisense strand (red) of indicate small RNA are cloned in the reporter, and sense strand-loaded Ago2 or antisense strand-loaded Ago2 can recognize and inhibit the expression of reporters containing their targets. Thus the luciferase readout will reflect the Ago2 loading level of each strand. (C and D) HEK293A cells were co-transfected with reporter carrying the target of antisense strands (C) or sense strand (D) of PR-1611 and mutated PR-1611. The relative luciferase levels of reporters were assessed by Dual-Luciferase Reporter Assay System.

### Figure S2. Sequencing diagram of Clone-5.

Sequencing diagram of Clone-5 with an 8-bp deletion in one allele and a 1-bp insertion in the other allele of the PR-1611 target site in the PR promoter region.

### Figure S3. Semi-quantitative analysis of promoter DNA binding with saRNA.

(A and B) PR promoter DNA was demonstrated by semi-quantitative PCR (31 cycles) after streptavidin purification from WT HEK293A (A) or Clone-5 cells (B).

### Figure S4. Correlation between PR mRNA and AT-2.

(A and B) Plots of PR mRNA (A) and AT-2 (B) expression in MCF-7 cells transfected with PR-si1 for 24 h. (C and D) Plots of PR mRNA (C) and AT-2 (D) expression in MCF-7 cells treated with AT2-si1 or AT2-si2 for 24 h. (E) Plot of AT-2 mRNA expression in MCF-7 cells with co-transfection of siRNAs of AT-2 and saRNAs of PR. mRNA expression level were assessed by qPCR. In the co-transfection experiments, cells were harvested 72 h after the second transfection. \*\*P <0.01; \*\*\*P <0.001.

**Figure S5. A working model of RNAa induced by PR-1611.**

A promoter-targeted saRNA (PR-1611) is loaded in an Ago2 protein, using the antisense strand (red) as the guide strand. The saRNA-loaded Ago2 targets the complementary sequence of the saRNA at distal PR promoter. The bind between saRNA-loaded Ago2 and promoter DNA results in the recruitment of various chromatin modifying or remodeling complexes, which together mediate the transcriptional activation of PR gene.

FIGURES

Figure S1

A

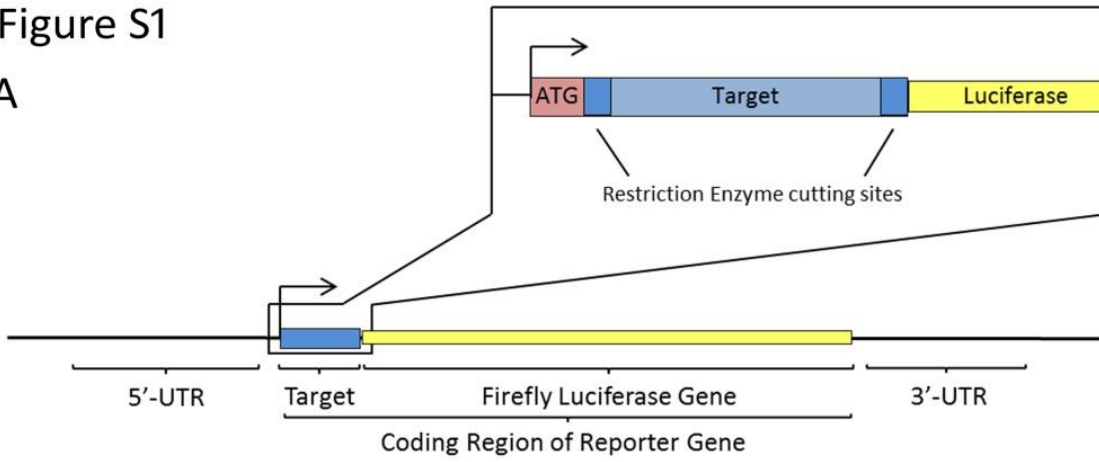

Luciferase Reporter

B

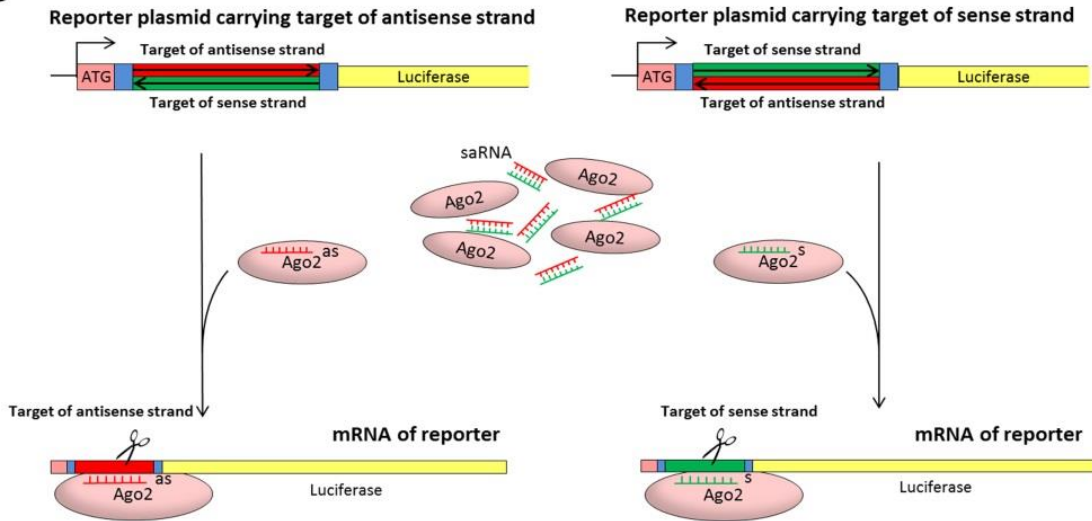

C

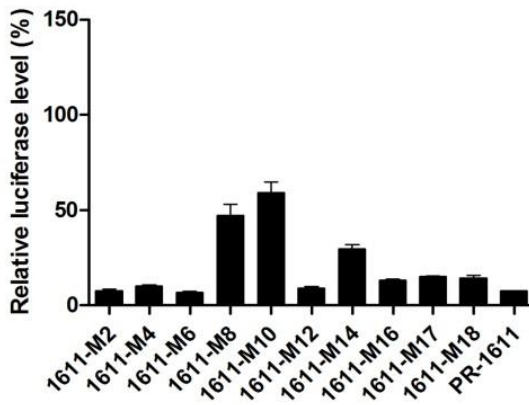

D

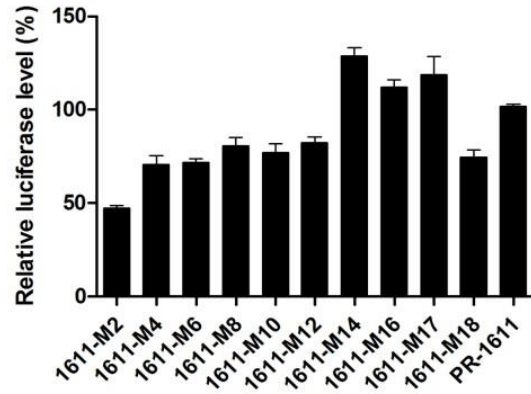

Figure S2

A A A A A G G A G T G A A G T A C T G A T T C A T G T G G A  
A A A A A G G A G T T G A A G G A G T G A A G T A C T G A T

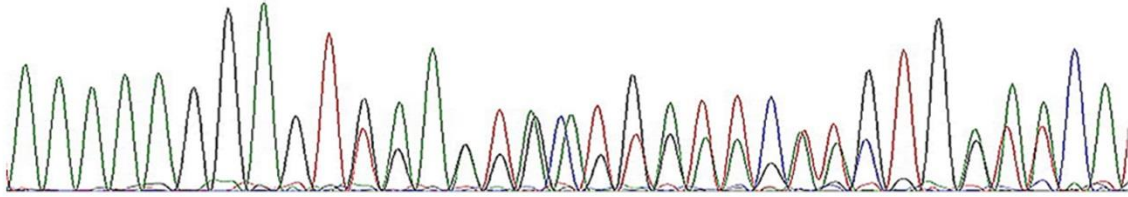



Figure S3

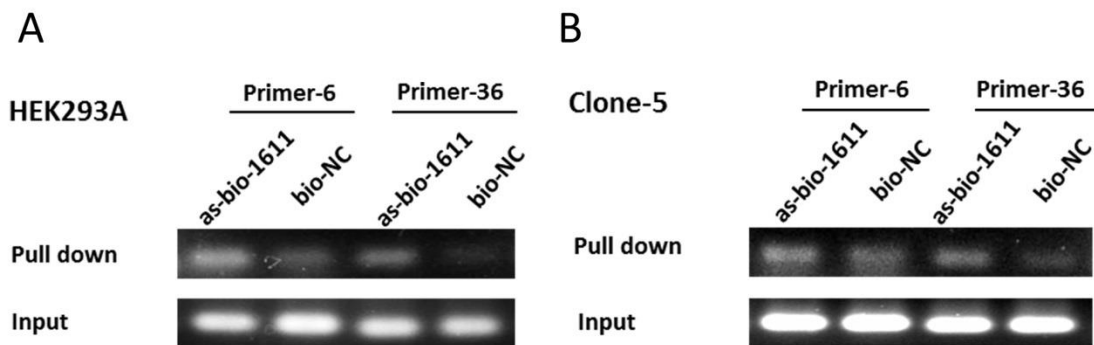

Figure S4

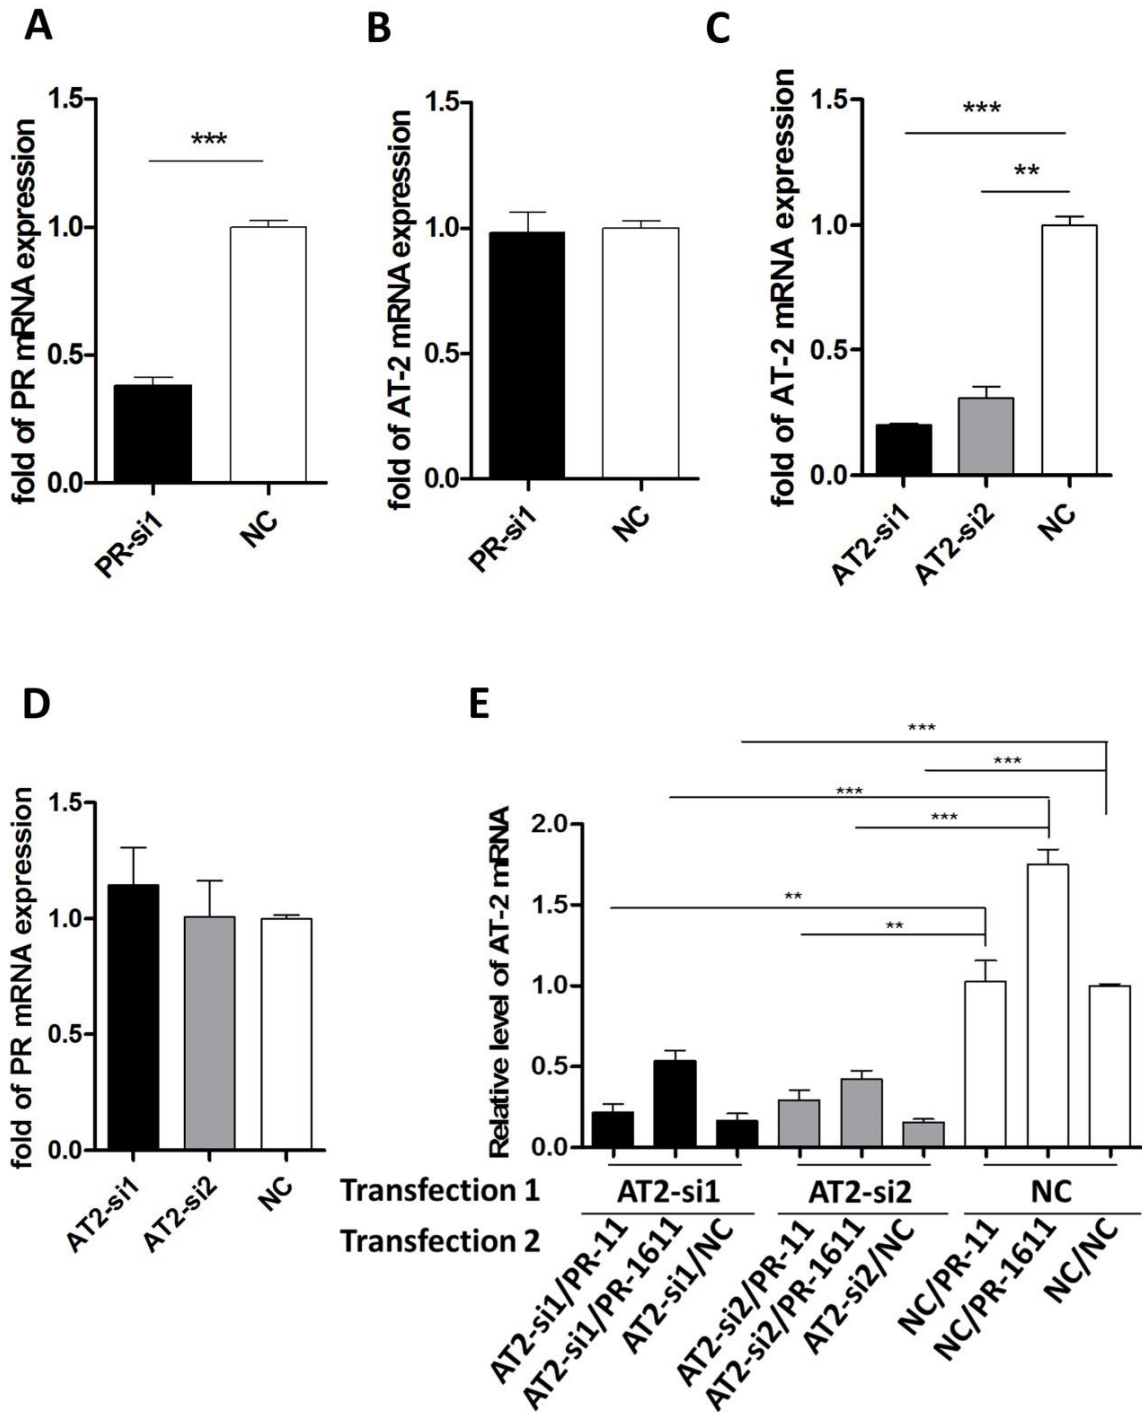

Figure S5

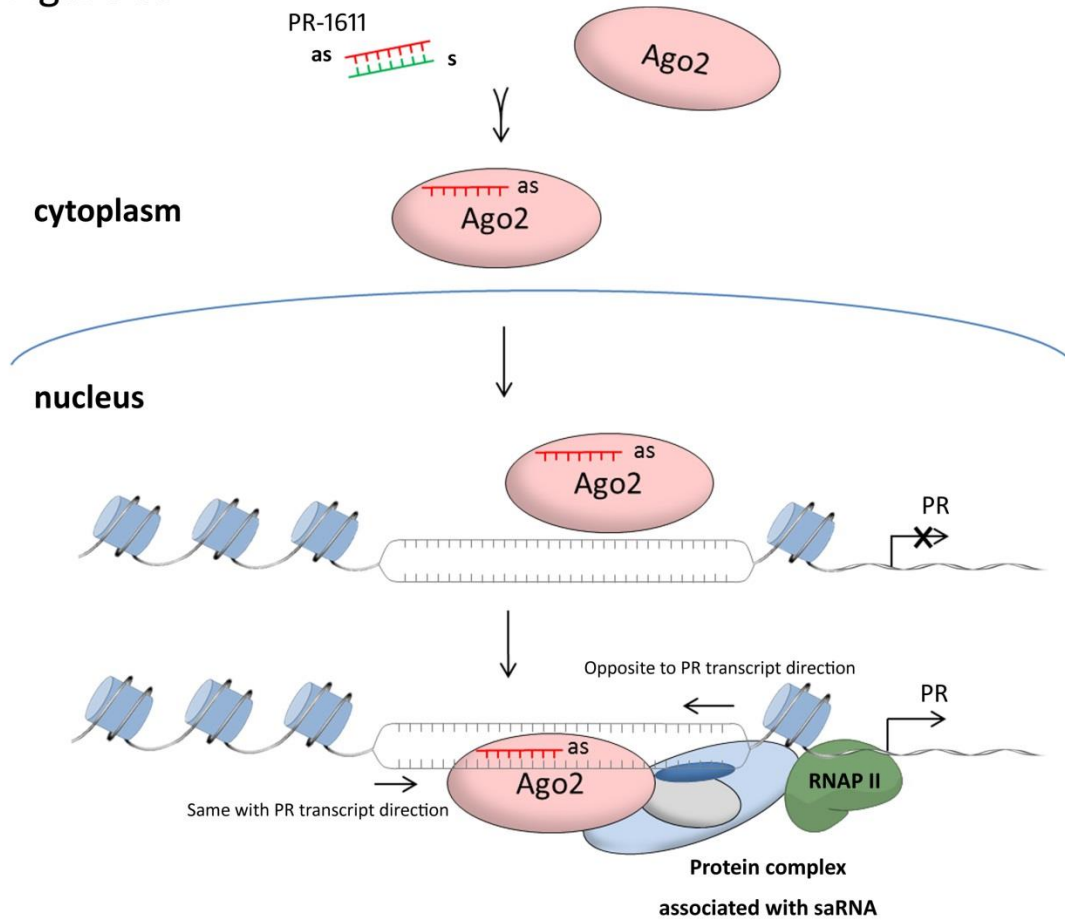

Supplement: supp_gkw076_nar-03677-f-2015-File008.pdf [file supp_gkw076_nar-03677-f-2015-File008.pdf]
